# Supplementary material for: A new cobalt(ii)meso-porphyrin: synthesis, characterization, electric properties and application in the catalytic degradation of dyes
Source: Royal Society of Chemistry journal article supplement (doi:10.1039/d0ra08786f), 2020-01-01
Supplement: d0ra08786f1.pdf [file d0ra08786f1.pdf]

## Electronic Supplementary Information (ESI)

### A new cobalt(II) meso-porphyrin: Synthesis, characterization, electric property and application in catalytic degradation of dyes

Nesrine Amiri<sup>a,\*</sup>, Mouhieddine Guergueb<sup>a</sup>, Maged S. Al-Fakeh<sup>b</sup>, Marwa Bourguiba<sup>c,d</sup> and Habib Nasri<sup>a</sup>

<sup>a</sup> *Laboratory of Physical Chemistry of Materials, University of Monastir, Avenue of the Environment, 5019 Monastir, Tunisia.*

<sup>b</sup> *Department of Chemistry, Faculty of Science, Qassim University, Saudi Arabia.*

<sup>c</sup> *Applied Mechanics and Systems Research Laboratory (LASMAP-EPT), polytechnic school, La Marsa, University of carthage, Tunisia.*

<sup>d</sup> *Faculty of science of Tunis, University of Tunis el manar, Tunisia.*

#### Table of contents

| No. | Contents                                                                                                                                                                                                                                                                  | Pg No. |
|-----|---------------------------------------------------------------------------------------------------------------------------------------------------------------------------------------------------------------------------------------------------------------------------|--------|
| 1   | Scheme S1: Main chemical preparation steps.                                                                                                                                                                                                                               | 2      |
| 2   | Table S1: UV/Vis data of several free base <i>meso</i> -porphyrins, H <sub>2</sub> TMAPP ( <b>1</b> ), Co <sup>II</sup> TMAPP ( <b>2</b> ) and a selection of cobalt <i>meso</i> -metalloporphyrins in dichloromethane.                                                   | 3      |
| 3   | Table S2: Electrochemical data for H <sub>2</sub> TMAPP ( <b>1</b> ), [Co <sup>II</sup> (TMAPP)] ( <b>2</b> ) and a selection of <i>meso</i> -porphyrins and Co(II) <i>meso</i> -metalloporphyrins. All data are obtained from voltammograms recorded in dichloromethane. | 4      |
| 4   | Fig. S1: IR spectrum of H <sub>2</sub> TMAPP ( <b>1</b> ).                                                                                                                                                                                                                | 5      |
| 5   | Fig. S2: IR spectrum of Co <sup>II</sup> TMAPP ( <b>2</b> ).                                                                                                                                                                                                              | 5      |
| 6   | Fig. S3. <sup>1</sup> HNMR spectrum of H <sub>2</sub> TMAPP ( <b>1</b> ).                                                                                                                                                                                                 | 6      |
| 7   | Fig. S4. <sup>1</sup> HNMR spectrum of Co <sup>II</sup> TMAPP ( <b>2</b> ).                                                                                                                                                                                               | 6      |
| 8   | Fig. S5. Positive MALDI-TOF mass spectrum of H <sub>2</sub> TMAPP ( <b>1</b> ).                                                                                                                                                                                           | 7      |
| 9   | Fig. S6. Positive MALDI-TOF mass spectrum of [Co <sup>II</sup> (TMAPP)] ( <b>2</b> ).                                                                                                                                                                                     | 7      |
| 10  | Fig. S7. FT-IR spectra of [Co <sup>II</sup> (TMAPP)]: (a) before degradation, (b) after degradation of MB, and (c) after degradation of CV.                                                                                                                               | 8      |
| 11  | References                                                                                                                                                                                                                                                                | 9      |

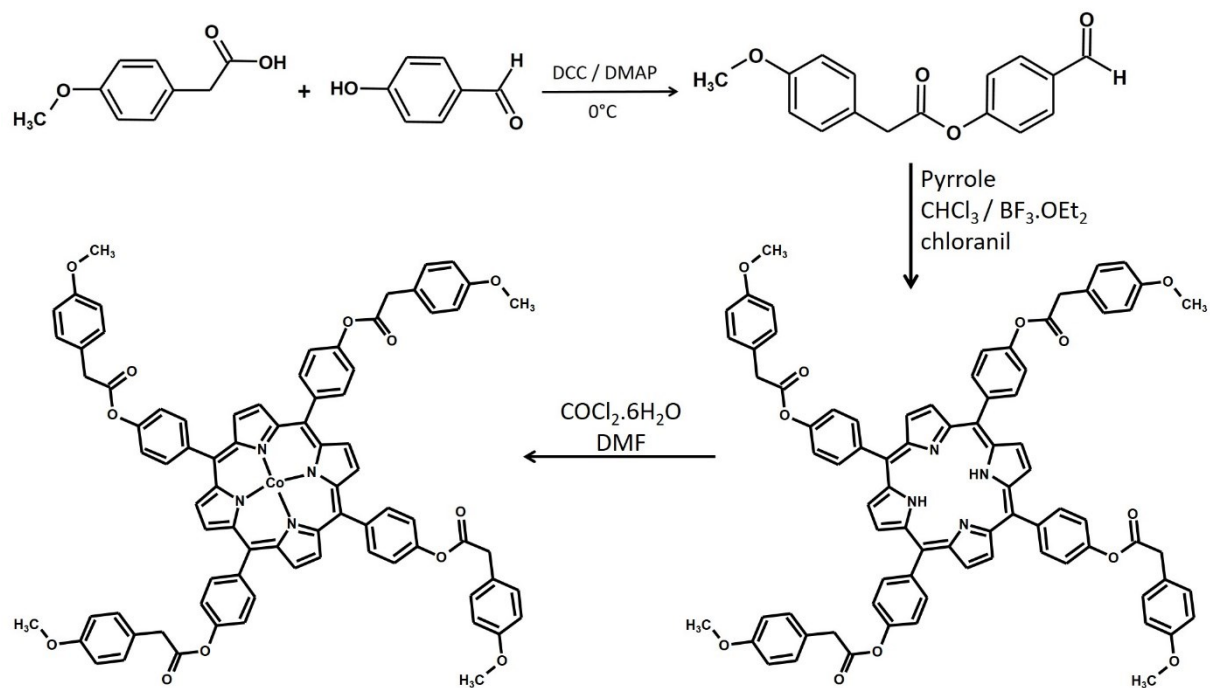

**Scheme S1.** Main chemical preparation steps.

**Table S1:** UV/Vis data of several free base meso-porphyrins, H<sub>2</sub>TMAPP (1), Co<sup>II</sup>TMAPP (2) and a selection of cobalt *meso*-metalloporphyrins in dichloromethane.

| Compound                      | Soret band<br>$\lambda$ [nm] (log $\epsilon$ ) | Q bands<br>$\lambda$ [nm] (log $\epsilon$ ) |            |            | [ref]                |
|-------------------------------|------------------------------------------------|---------------------------------------------|------------|------------|----------------------|
| <i>Meso-porphyrins</i>        |                                                |                                             |            |            |                      |
| H <sub>2</sub> TPP            | 416 (6.10)                                     | 513 (5.70)                                  | 550 (4.36) | 590 (4.24) | 646 (4.19) [1]       |
| H <sub>2</sub> TTP            | 420 (5.95)                                     | 515 (5.82)                                  | 555 (4.28) | 595 (4.17) | 650 (4.10) [1]       |
| H <sub>2</sub> TBrPP          | 419 (6.58)                                     | 515 (5.24)                                  | 549 (4.93) | 590 (4.77) | 648 (4.68) [2]       |
| H <sub>2</sub> TPBP           | 419 (5.90)                                     | 515 (4.46)                                  | 551 (4.13) | 590 (3.94) | 646 (3.84) [3]       |
| H <sub>2</sub> Pp             | 421                                            | 517                                         | 553        | 592        | 648 [4]              |
| H <sub>2</sub> TMAPP          | 425 (5.92)                                     | 522(5.67)                                   | 550 (4.32) | 597 (4.15) | 653 (3.98) this work |
| <i>Co(II)-meso-porphyrins</i> |                                                |                                             |            |            |                      |
| [Co <sup>II</sup> (TPP)]      | 412                                            | 528                                         |            |            | [5]                  |
| [Co <sup>II</sup> (TpivPP)]   | 412                                            | 524                                         |            |            | [6]                  |
| [Co <sup>II</sup> (TPBP)]     | 412 (6.07)                                     | 528 (5.58)                                  |            |            | [7]                  |
| [Co(II)(Pp)]                  | 414                                            | 531                                         |            |            | [4]                  |
| [Co <sup>II</sup> (TMAPP)]    | 415 (5.85)                                     | 539 (5.49)                                  |            |            | this work            |

**Table S2.** Electrochemical data <sup>a</sup> for H<sub>2</sub>TMAPP, [Co<sup>II</sup>(TMAPP)] and a selection of *meso*-porphyrins and Co(II) *meso*-metalloporphyrins. All data are obtained from voltammograms recorded in dichloromethane.

|                                 | Oxidations                    |                        |                        |                   | Reductions            |                       |                                                | Ref.      |
|---------------------------------|-------------------------------|------------------------|------------------------|-------------------|-----------------------|-----------------------|------------------------------------------------|-----------|
|                                 | 1 <sup>st</sup>               | 2 <sup>nd</sup>        | 3 <sup>rd</sup>        | Oxid.Co(II)/      | 1 <sup>st</sup>       | 2 <sup>nd</sup>       | Red Co(II)/                                    |           |
|                                 | Porph oxid.<br>(O1,R1)        | Porph oxid.<br>(O2,R2) | Porph oxid.<br>(O3,R3) | Co(III)<br>(MO2)  | Porph red.<br>(R4,O4) | Porph red.<br>(R5,O5) | Co(I)<br>(MR1 <sup>b</sup> ,MO1 <sup>c</sup> ) |           |
|                                 | E <sub>1/2</sub> <sup>d</sup> | E <sub>1/2</sub>       | E <sub>1/2</sub>       | E <sub>1/2</sub>  | E <sub>1/2</sub>      | E <sub>1/2</sub>      | E <sub>1/2</sub>                               |           |
| <b>H<sub>2</sub>TPP</b>         | 1.02                          | 1.26                   | —                      | —                 | -1.20                 | -1.55                 | —                                              | [8]       |
| <b>H<sub>2</sub>TMPP</b>        | 1.02                          | 1.19                   | 1.67 <sup>c</sup>      | —                 | -1.19                 | -1.52                 | —                                              | [9]       |
| <b>H<sub>2</sub>TCIPP</b>       | 1.00                          | 1.23                   | 1.53                   | —                 | -1.09                 | -1.41                 | —                                              | [9]       |
| <b>H<sub>2</sub>TMAPP</b>       | 1.15                          | 1.46                   | 1.66                   | —                 | -1.08                 | -1.41                 | —                                              | This work |
| <b>[Co<sup>II</sup>(TPP)]</b>   | 1.16                          | —                      | —                      | 0.98              | -1.40 <sup>e</sup>    | —                     | -0.83                                          | [10]      |
| <b>[Co<sup>II</sup>(TPP)]</b>   | 0.97                          | —                      | —                      | 0.78              | —                     | —                     | -0.85                                          | [11]      |
| <b>[Co<sup>II</sup>(TPP)]</b>   | 0.91                          | —                      | —                      | 0.75              | —                     | —                     | —                                              | [12]      |
| <b>[Co<sup>II</sup>(TCIPP)]</b> | 1.00                          | 1.26                   | 1.85                   | 0.60 <sup>c</sup> | -1.40                 | —                     | -0.88                                          | [9]       |
| <b>[Co<sup>II</sup>(TMPP)]</b>  | 0.93                          | 1.20                   | —                      | 0.70 <sup>c</sup> | -1.36                 | —                     | -0.70                                          | [9]       |
| <b>[Co<sup>II</sup>(TMAPP)]</b> | 1.08                          | 1.29                   | —                      | 0.61              | -1.38                 | —                     | -0.93                                          | This work |

<sup>a</sup> The potentials are reported versus SCE. <sup>b</sup> MR Metal Reduction. <sup>c</sup> MO Metal Oxidation. <sup>d</sup> E<sub>1/2</sub> half wave potential. <sup>e</sup> Irreversible wave.

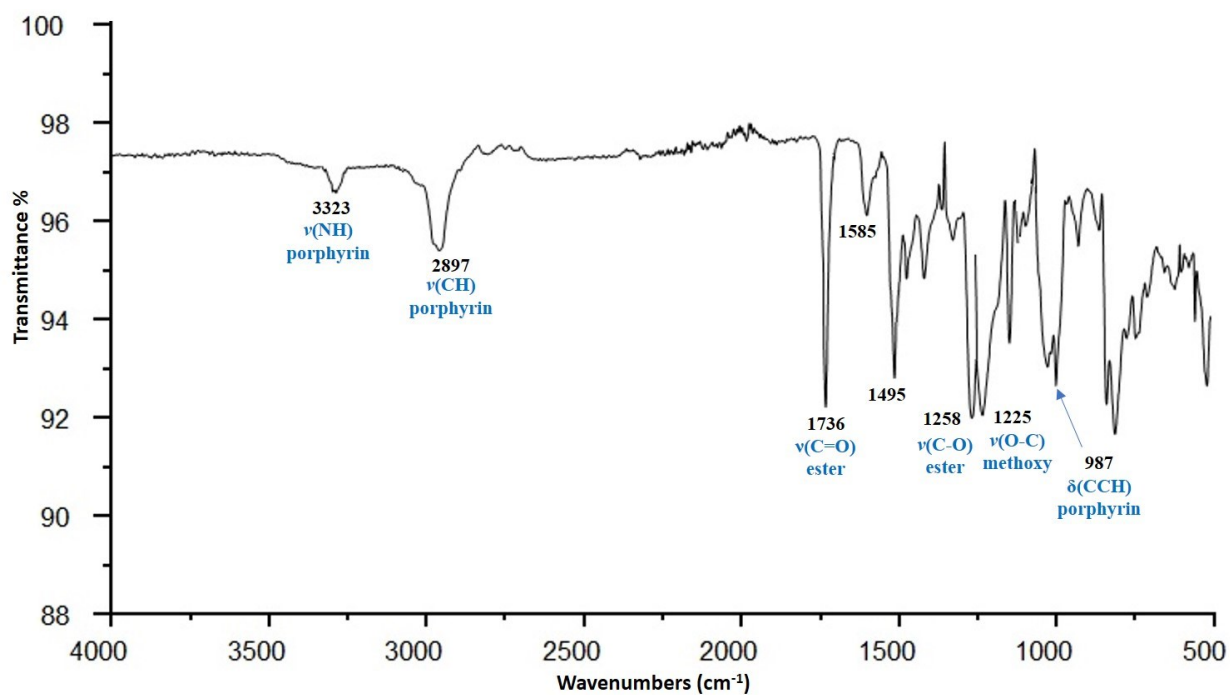

Fig. S1. IR spectrum of (1).

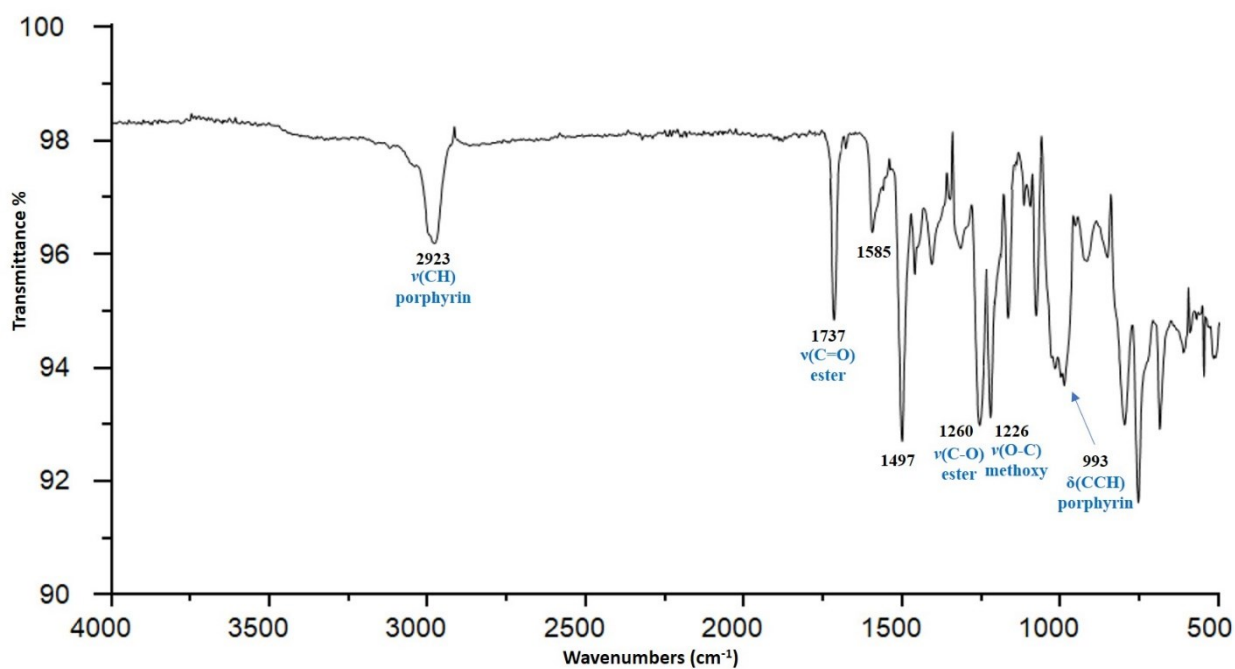

Fig. S2. IR spectrum of (2).

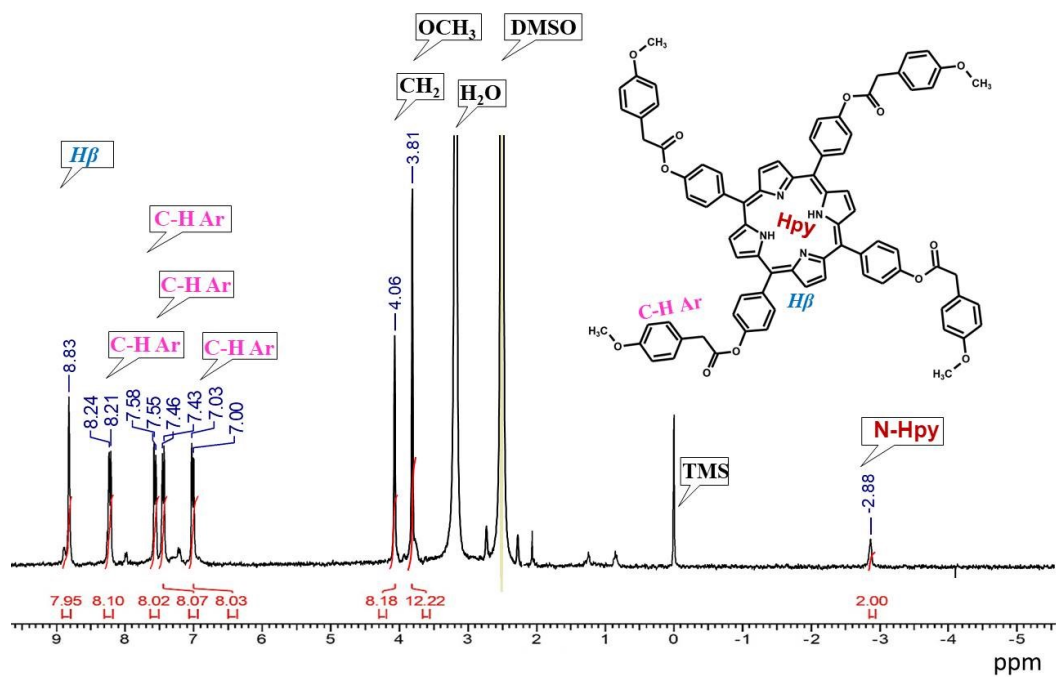

Fig. S3.  $^1H$ NMR spectrum of  $H_2TMAPP$  (1).

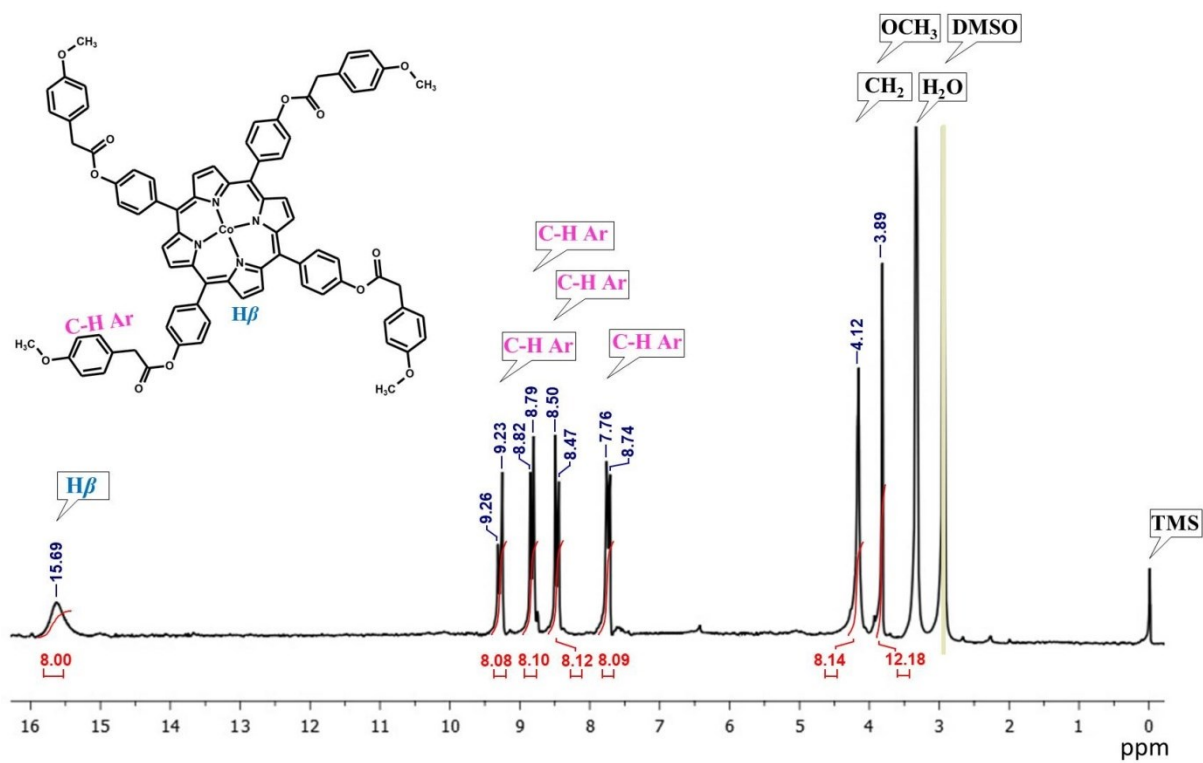

Fig. S4.  $^1H$ NMR spectrum of  $Co^{II}TMAPP$  (2).

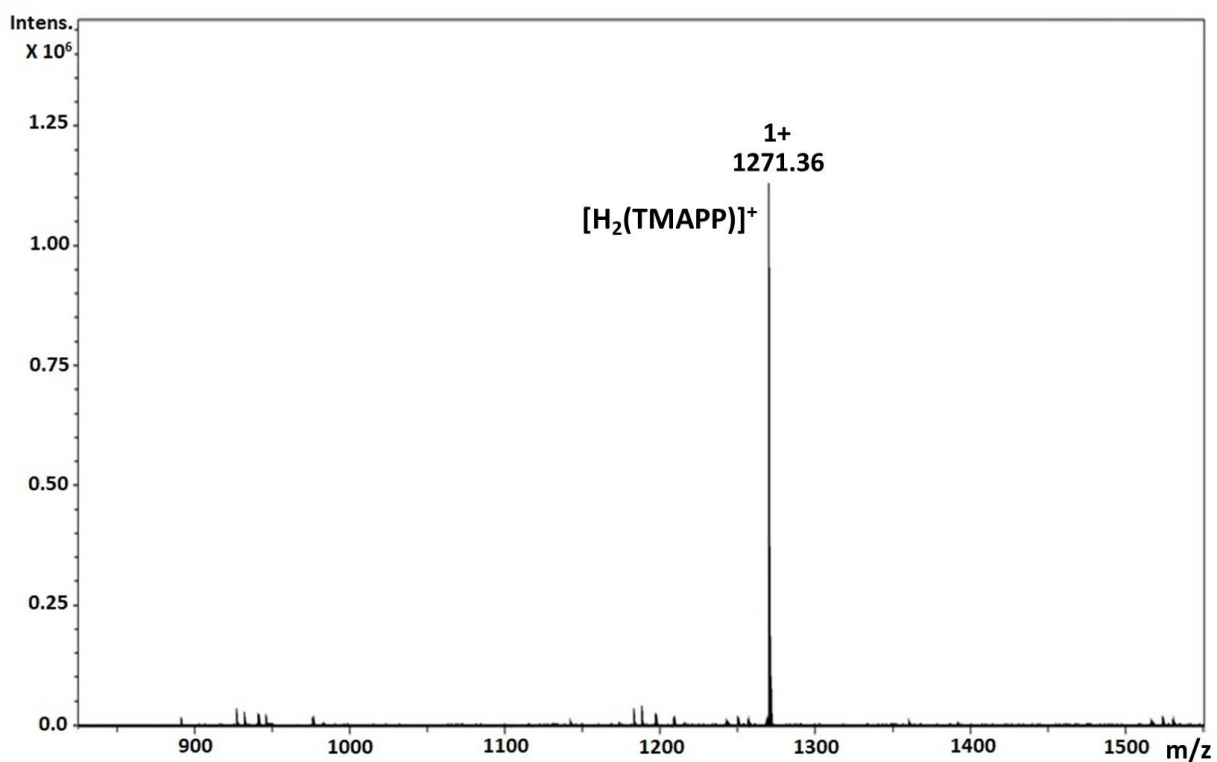

**Fig. S5.** Positive MALDI-TOF mass spectrum of  $\text{H}_2\text{TMAPP}$  (1).

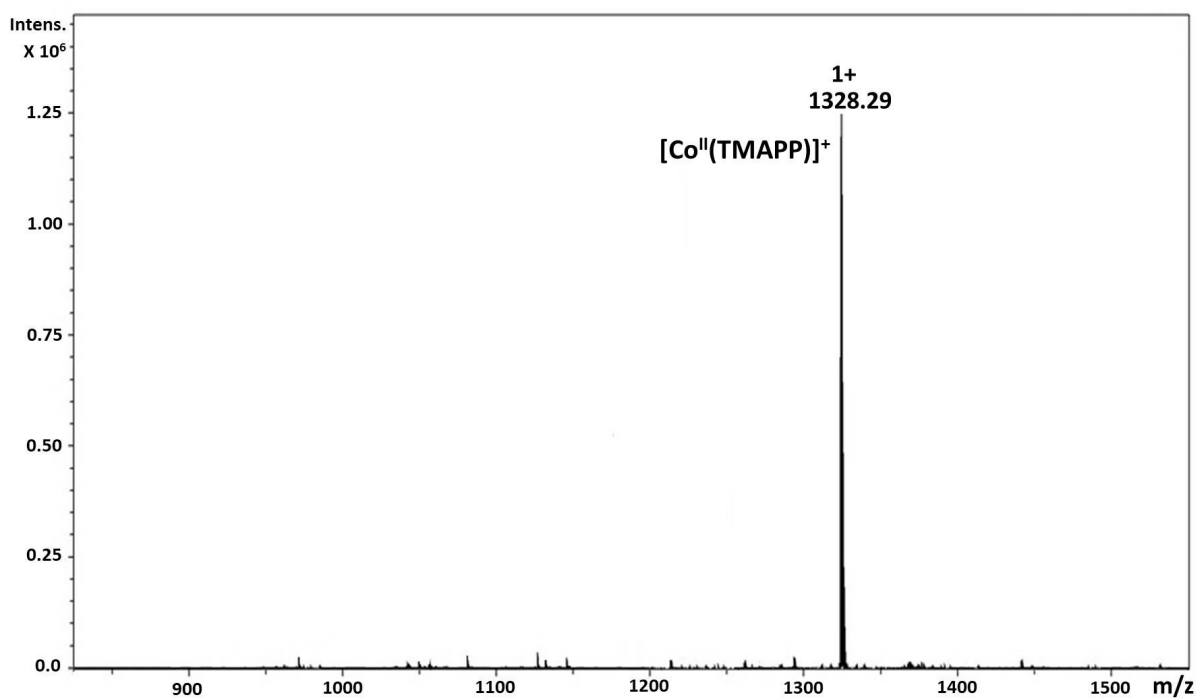

**Fig. S6.** Positive MALDI-TOF mass spectrum of  $[\text{Co}^{\text{II}}(\text{TMAPP})]$  (2).

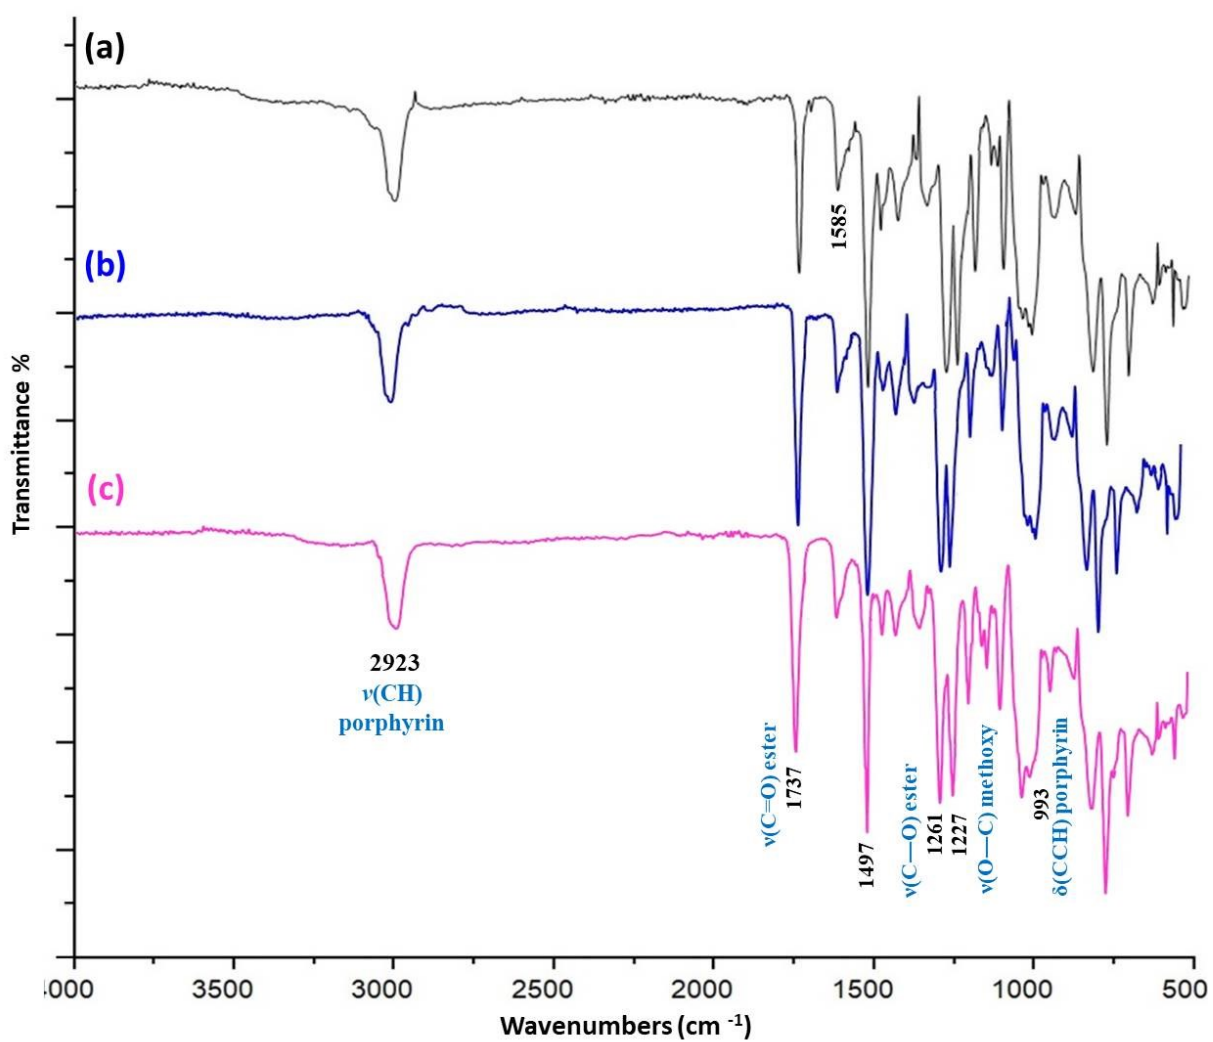

**Fig. S6.** FT-IR spectra of [Co<sup>II</sup>(TMAPP)]: (a) before degradation, (b) after degradation of MB, and (c) after degradation of CV.



## References

- [1]. Z. Denden, K. Ezzayani, E. Saint-Aman, F. Loiseau, S. Najmudin, C. Bonifácio, J.-C. Daran and H. Nasri, *Eur. J. Inorg. Chem.* 2015, **15**, 2596-2610.
- [2]. N. Amiri, F. Ben Taheur, S. Chevreux, E. Wenger, G. Lemerrier and H. Nasri, *Tetrahedron* 2017, **73**, 7011-7016.
- [3]. N. Amiri, M. Hajji, F. Ben Taheur, S. Chevreux, T. Roisnel, G. Lemerrier and H. Nasri, *J. Solid State Chem.* 2018, **258**, 477–484.
- [4]. Y. X. Du, Z. Q. Zhang, Y. H. Yao and J. Li, *Inorg. Chem. Commun.* 2016, **64**, 19–22.
- [5]. Y. Belghith, A. Mansour, J.-C. Daran and H. Nasri, *Open J Inorg Chem.* 2012, **2**, 81-87.
- [6]. A. Mansour, Y. Belghith, M. S. Belkhiria, A. Bujaczb, V. Gue´rineau and H. Nasri, *J. Porphyrins Phthalocyanines* 2013, **17**, 1094–1103.
- [7]. N. Amiri, S. Nour, M. Hajji, T. Roisnel, T. Guerfel, G. Simonneaux and H. Nasri, *Saudi Chem. Soc.* 2019, **23**, 781–794.
- [8]. K. M. Kadish and M. M. Morrison, *J. Am. Chem. Soc.* 1976, **98**, 3326–3328.
- [9]. M. Guergueb, S. Nasri, J. Brahmi, F. Loiseau, F. Molton, T. Roisnel, V. Guerineau, I. Turowska-Tyrk, K. Aouadi and Habib Nasri, *RSC Adv.* 2020, **10**, 6900–6918.
- [10]. X. Ke, R. Kumar, M. Sankar and K. M. Kadish, *Inorg. Chem.* 2018, **57**, 1490–1503.
- [11]. K. M. Kadish, X. H. Mu and X. Q. Lin, *Inorg. Chem.* 1988, **17**, 1489–1492.
- [12]. L. A. Truxillo and D. G. Davis, *Anal. Chem.*, 1975, **47**, 2260–2267.
